# Supplementary material
Source: PubMed Central journal article supplement (PMC1820916)
Supplement: plntphys_pp.106.091686_1.pdf [file plntphys_pp.106.091686_1.pdf]

*Supplementary material*

**Table 1.** NO synthase activity in wild-type, L1 and L5 lines. NOS activity was determined at 0, 1, 2 and 3 days after infiltration (dpi) with *Psm avrRpm1* ( $10^6$  CFU mL<sup>-1</sup>) using a NOS assay kit (Sigma Aldrich Co, St. Louis, Missouri, USA). Activity is expressed in U  $\mu$ gprot<sup>-1</sup>. Abbreviations: T0, unchallenged plants; syst, systemic leaves; loc, local leaves; nd, not determined.

| <b>NOS activity (U <math>\mu</math>gprot<sup>-1</sup>)</b> |                 |                  |                 |
|------------------------------------------------------------|-----------------|------------------|-----------------|
|                                                            | <b>WT</b>       | <b>L1</b>        | <b>L5</b>       |
| T0                                                         | 36.70 $\pm$ 2.8 | 34.74 $\pm$ 1.9  | 35.08 $\pm$ 1.7 |
| syst 1 dpi                                                 | 40.43 $\pm$ 2.6 | 37.65 $\pm$ 0.9  | 40.86 $\pm$ 2.0 |
| syst 2 dpi                                                 | 38.26 $\pm$ 1.7 | 43.98 $\pm$ 1.5  | 34.29 $\pm$ 2.3 |
| syst 3 dpi                                                 | 36.19 $\pm$ 3.0 | 33.42 $\pm$ 2.3  | 38.67 $\pm$ 3.1 |
| loc 2 dpi                                                  | nd              | 118.46 $\pm$ 4.3 | nd              |
